# Supplementary material
Source: PubMed Central journal article supplement (PMC3642683)

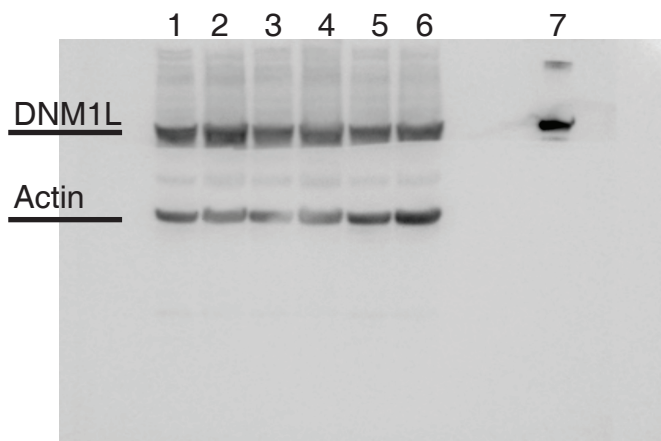

Test Western Blot to check efficiency of anti DNM1L and anti Actin antibodies

Lanes 1-6: 6 different crude COS-7 cell lysates  
 Lane 7: recombinantly expressed DNM1L  
 Lane 7 was used for Figure 2F to probe the antibody

Experimental Western Blot to check efficiency of anti DNM1L siRNA

Lane 1: recombinantly expressed DNM1L  
 Lane 2: crude COS-7 cell lysate with anti DNM1L siRNA  
 Lane 3: crude COS-7 cell lysate with scrambled siRNA  
 Lane 4: crude COS-7 cell lysate

20s

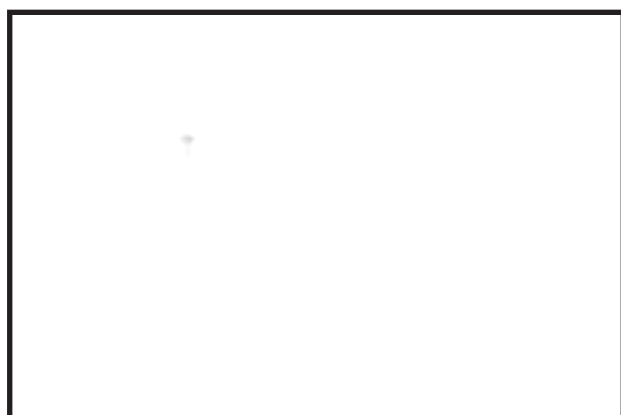

80s

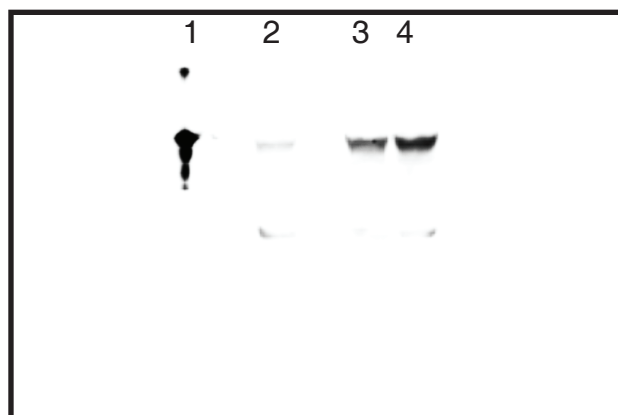

120s, used for DNM1L Figure 2F

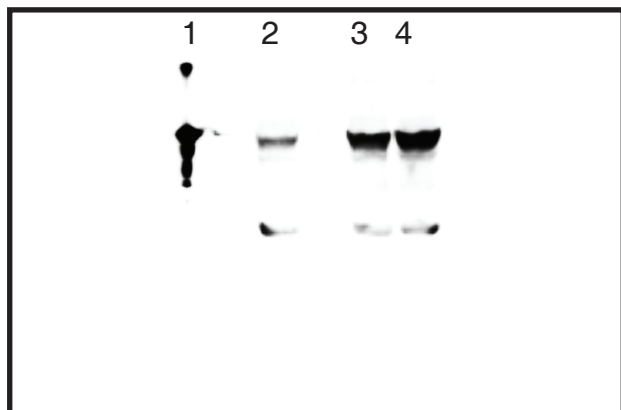

240s, used for Actin Figure 2F

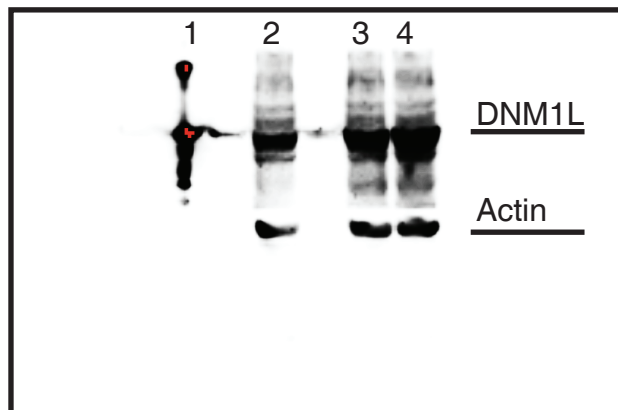

Marker

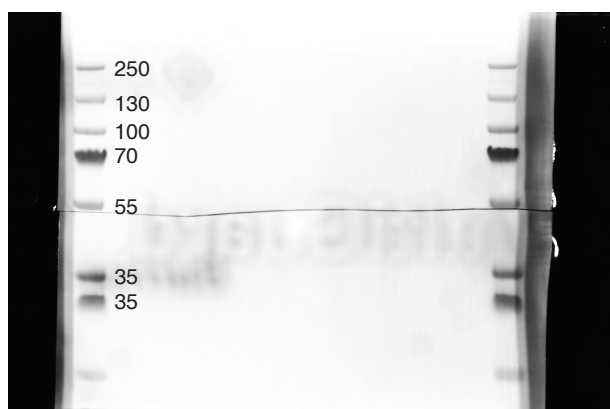

Overlay Marker / Blot

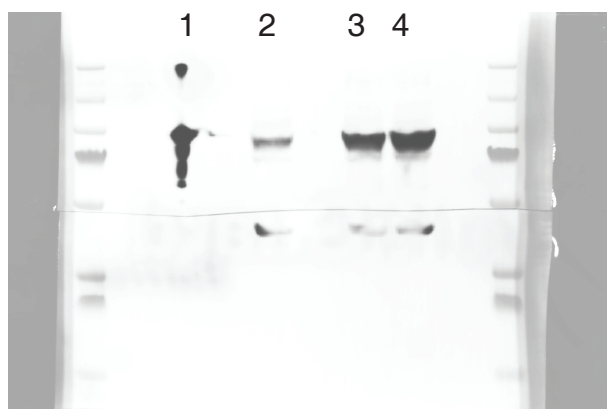

Supplement: emboj201374df2.pdf [file emboj201374df2.pdf]
