# Supplementary material
Source: PubMed Central journal article supplement (PMC3642683)

# Floatation Assay of DNM1L with and without PS liposomes

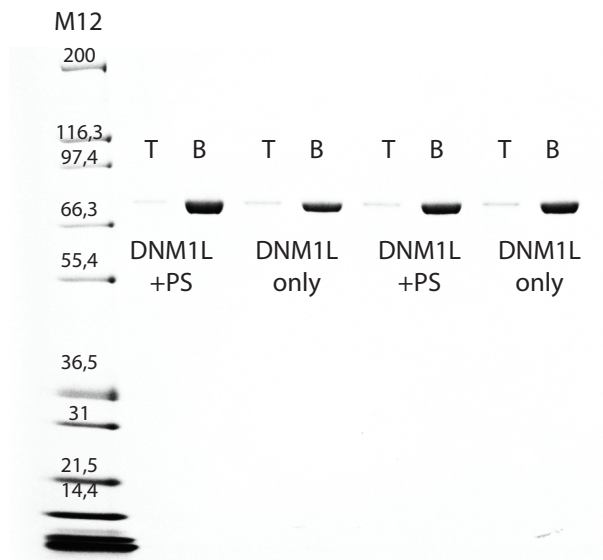

Supplement: emboj201374dfs5a.pdf [file emboj201374dfs5a.pdf]
